# Supplementary material
Source: publisher site journal article supplement (https://www.spandidos-publications.com/5546/downloadSupplementary)
Supplement: Supplementary file [file downloadSupplementary]

Table SI. Patient characteristics according to *CD47* rs3804639 genotype in the non-ICI cohort.

| Characteristic           | Overall    |            | <i>CD47</i> rs3804639 |            | P-value <sup>a</sup> |
|--------------------------|------------|------------|-----------------------|------------|----------------------|
|                          | (n=98)     | G/G (n=47) | G/T (n=45)            | T/T (n=6)  |                      |
| Median age, years(range) | 66 (32-89) | 67 (36-89) | 66 (35-86)            | 60 (32-73) | 0.32                 |
| Sex, n (%)               |            |            |                       |            | 0.22                 |
| Female                   | 43 (43.9%) | 24 (51.1%) | 16 (35.6%)            | 3 (50.0%)  |                      |
| Male                     | 55 (56.1%) | 23 (48.9%) | 29 (64.4%)            | 3 (50.0%)  |                      |
| Smoking status, n (%)    |            |            |                       |            | 1.00                 |
| Current/former           | 48 (49.0%) | 23 (48.9%) | 23 (51.1%)            | 2 (33.3%)  |                      |
| Never                    | 50 (51.0%) | 24 (51.1%) | 22 (48.9%)            | 4 (66.7%)  |                      |
| ECOG PS, n (%)           |            |            |                       |            | 0.21                 |
| 0-1                      | 92 (93.9%) | 46 (97.9%) | 41 (91.1%)            | 5 (83.3%)  |                      |
| 2-4                      | 6 (6.1%)   | 1 (2.1%)   | 4 (8.9%)              | 1 (16.7%)  |                      |
| Histology, n (%)         |            |            |                       |            | 0.25                 |
| Adenocarcinoma           | 89 (90.8%) | 45 (95.7%) | 38 (84.4%)            | 6 (100%)   |                      |
| Squamous                 | 4 (4.1%)   | 0 (0%)     | 4 (8.9%)              | 0 (0%)     |                      |
| Others                   | 5 (5.1%)   | 2 (4.3%)   | 3 (6.7%)              | 0 (0%)     |                      |
| EGFR mutation, n (%)     |            |            |                       |            | 0.21                 |
| Positive                 | 61 (62.2%) | 26 (55.3%) | 31 (68.9%)            | 4 (66.7%)  |                      |

|                             |            |            |            |           |      |
|-----------------------------|------------|------------|------------|-----------|------|
| Negative or unknown         | 37 (37.8%) | 21 (44.7%) | 14 (31.1%) | 2 (33.3%) |      |
| First-line treatment, n (%) |            |            |            |           | 0.69 |
| Cytotoxic chemotherapy      | 47 (48.0%) | 24 (51.1%) | 20 (44.4%) | 3 (50.0%) |      |
| EGFR or other TKI           | 51 (52.0%) | 23 (48.9%) | 25 (55.6%) | 3 (50.0%) |      |
| Liver metastasis, n (%)     |            |            |            |           | 0.61 |
| Positive                    | 3 (3.1%)   | 2 (4.3%)   | 1 (2.2%)   | 0 (0%)    |      |
| Negative                    | 95 (96.9%) | 45 (95.7%) | 44 (97.8%) | 6 (100%)  |      |

---

<sup>a</sup>P-value for comparison between patients with the G/G genotype and those with the G/T or G/G genotype of rs3804639. P-value for age is across all three groups. ECOG, Eastern Cooperative Oncology Group; PS, performance status; EGFR, epidermal growth factor receptor; TKI, tyrosine kinase inhibitor.

---
